# Supplementary material
Source: Springer Nature journal article supplement (https://www.springermedizin.de/resource/supplementary/12993_2011_389_MOESM4_ESM.pdf/9617680)

(a) CEU

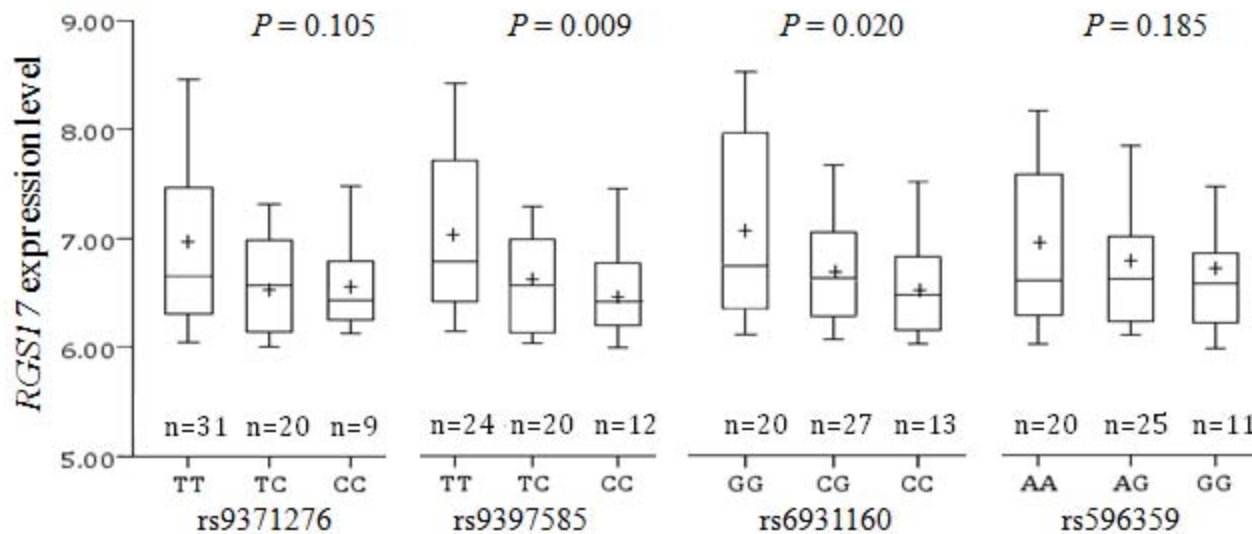

(b) YRI

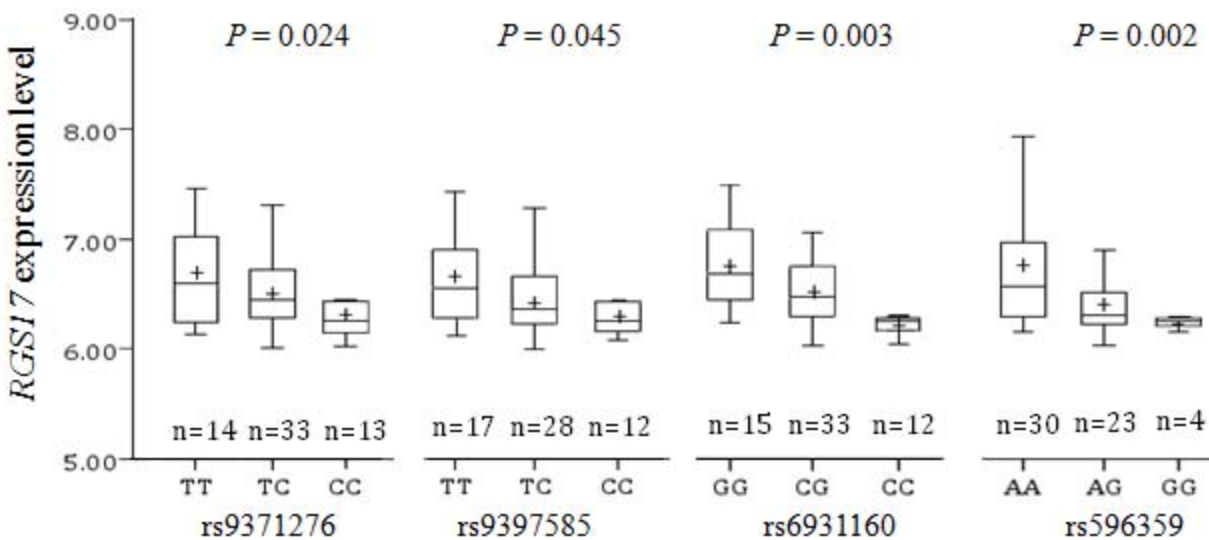

Supplement: MOESM4 [file 9617680]
